# Supplementary material for: Genome-wide expression profiles of Pyropia haitanensis in response to osmotic stress by using deep sequencing technology
Source: PubMed Central journal article supplement (PMC4661969; doi:10.1186/s12864-015-2226-5), 2015-11-26

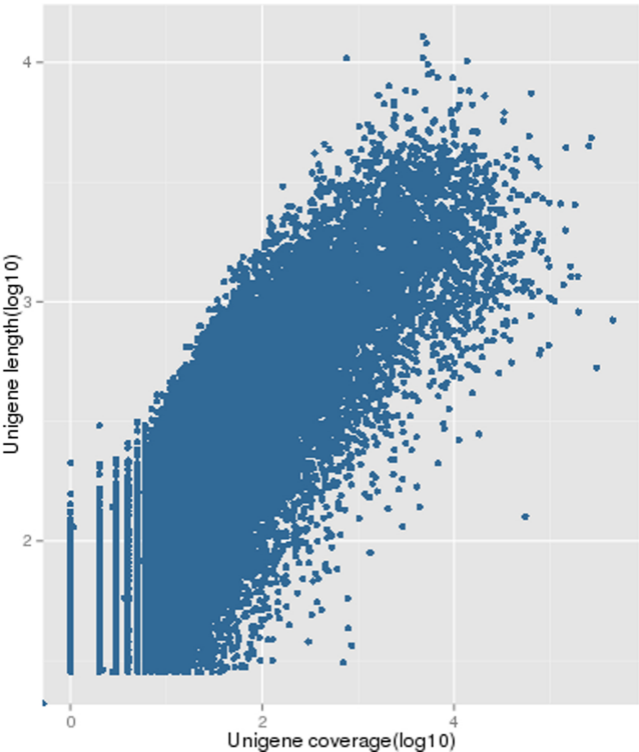

Supplement: 12864_2015_2226_MOESM2_ESM.pdf [file 12864_2015_2226_MOESM2_ESM.pdf]
