# Supplementary material for: Genome-wide expression profiles of Pyropia haitanensis in response to osmotic stress by using deep sequencing technology
Source: PubMed Central journal article supplement (PMC4661969; doi:10.1186/s12864-015-2226-5), 2015-11-26

CON\_1 vs CON\_2, R<sup>2</sup> = 0.936

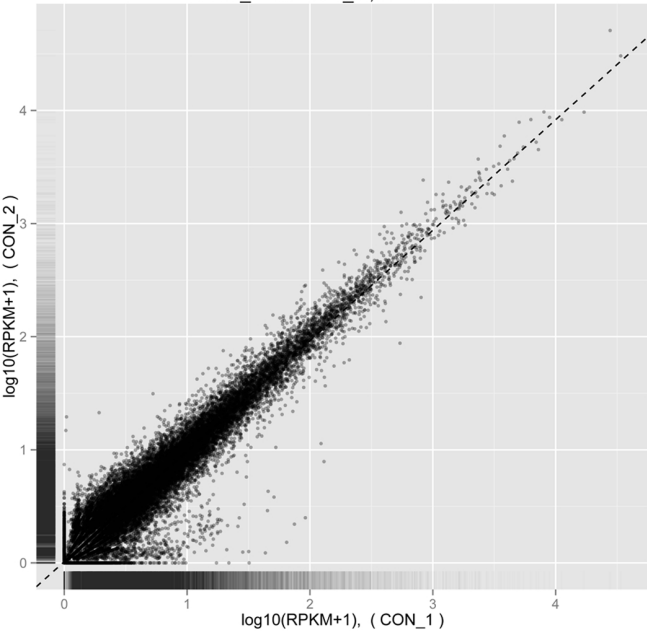

MWL\_1 vs MWL\_2, R<sup>2</sup> = 0.916

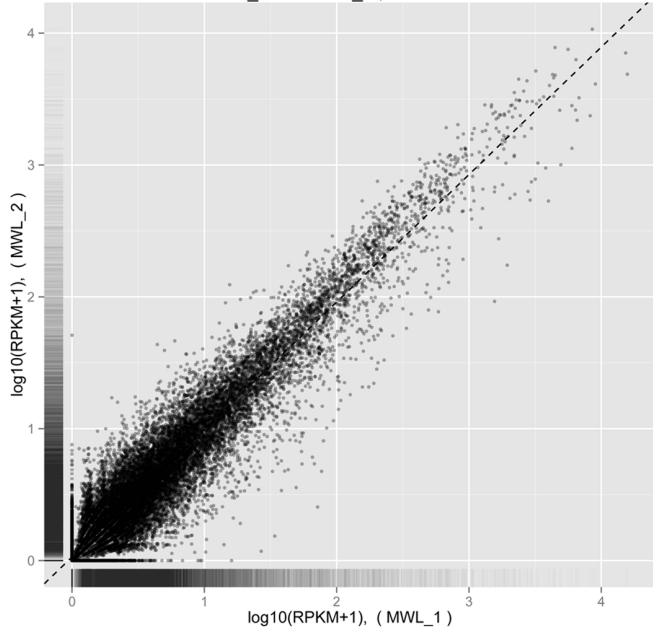

SWL\_1 vs SWL\_2, R<sup>2</sup> = 0.931

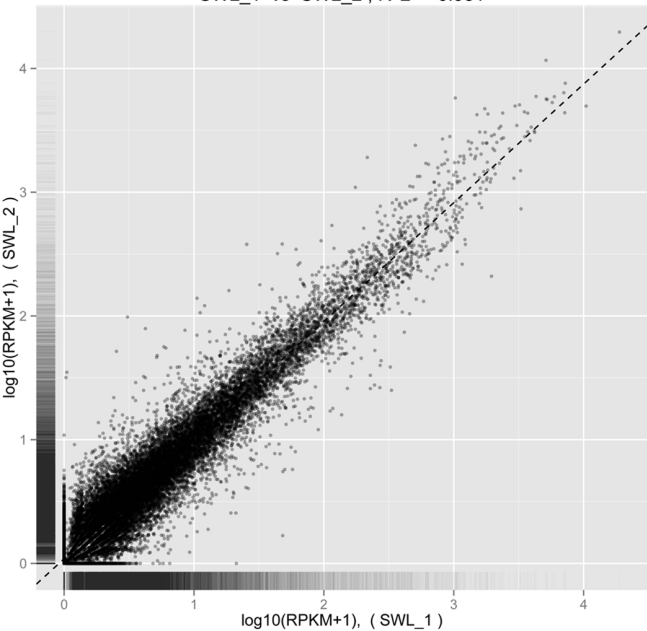

REH\_1 vs REH\_2, R<sup>2</sup> = 0.941

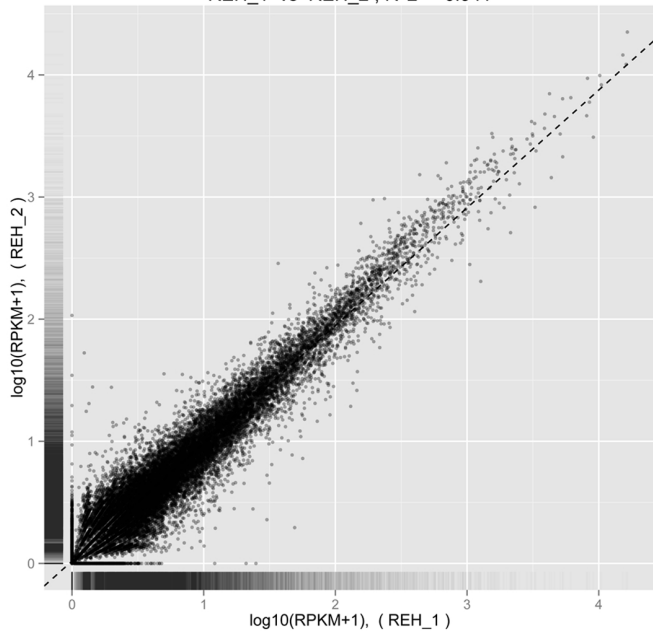

Supplement: 12864_2015_2226_MOESM4_ESM.pdf [file 12864_2015_2226_MOESM4_ESM.pdf]
