# Supplementary material for: Genome-wide expression profiles of Pyropia haitanensis in response to osmotic stress by using deep sequencing technology
Source: PubMed Central journal article supplement (PMC4661969; doi:10.1186/s12864-015-2226-5), 2015-11-26
Supplement: 12864_2015_2226_MOESM14_ESM.pdf [file 12864_2015_2226_MOESM14_ESM.pdf]

1 ATGCGGAGAAGGATGGCCACTTTGATGCTTGAAGGATAAGAAGGATGGCACCCAGGTG  
1 M A E K D G H F D A W K D K K D G T Q V

61 ATTGCCGCGACCGCTACCTGGAGCCTTATGCGGATTCGCTGCGGTATCGCTTCACCAAG  
21 I A A D R Y L E P Y A D S L R Y R F T K

121 TACAACGAGATCAAAAACGCCATCGAGGAGAGCGAAGGCGGCCTGGGAAAGTTTGC GCAG  
41 Y N E I K N A I E E S E G G L G K F A Q

181 TCCTACAAGTCGTTTGGCCTGCACGCTGTAGAGGGGGCGTTGAGTACCGTGAGTGGGCT  
61 S Y K S F G L H A V E G G V E Y R E W A

241 CCTGGCGCTCAGTCCGTGTCTGTCTTTGGCGACTTCAACGGCTGGAACCGGAACTCGCAT  
81 P G A Q S V S V F G D F N G W N R N S H

301 CAGCTGACGCGTGGGGAGTTTGGGATTTGGACGACCACCATTCCGGACAATGAGGACGGT  
101 Q L T R G E F G I W T T T I P D N E D G

361 TCCCCGGCGGTGCCGCACGGCTCCAAGGTGAAGGTGTGCATTGTGACTCCCGGCGGGATG  
121 S P A V P H G S K V K V C I V T P G G M

421 CACCTGGATCGGAACCCGGCGTGGGCCACGTACCTCATCCAGAACCCGTCGACGCTCCTG  
141 H L D R N P A W A T Y L I Q N P S T L L

481 TTTGATACGGTGT TTTTGAACCCGCCGGAGGAGCACAAGTACCAGTGAAGCACCAGAAG  
161 F D T V F W N P P E E H K Y Q W K H Q K

541 CACCCCCGGCCCCAGAGTGCATGCGCATCTACGAATGCCACGTCGGGATGGGCTCGGCC  
181 H P P A P E C M R I Y E C H V G M G S A

601 GACCCCAAGGTGGGCACCTACGACGAATTCACCGACAACATCCTGCCGCGGATTAAGGAC  
201 D P K V G T Y D E F T D N I L P R I K D

661 CTGGGCTTACAGCCATCCAGATTATGGCCATCATGGAGCATGCGTACTACGGTTCTTTT  
221 L G F T A I Q I M A I M E H A Y Y G S F

721 GGTTACCACGTCACCAACTTTTTTGCCATTTCTTCTCGGAGCGGCGATCCAGAAGGGCTC  
241 G Y H V T N F F A I S S R S G D P E G L

781 AAGCGCTTGATTGACACGGCGCATGGCATGGGGCTTGTGTCTGATGGATGTCGTTTAC  
261 K R L I D T A H G M G L V V L M D V V H

841 AGCCACGCCTCCTCCAACCTCGATGGATGGGATCAACCAGTTTGATGGCACCGACCACCAG  
281 S H A S S N S M D G I N Q F D G T D H Q

901 TACTTCCATGAGGGCGAGCGGGTCGGCACTCGCTGTGGGACTCGCGGCTGTTCAACTAT  
301 Y F H E G E R G R H S L W D S R L F N Y

961 GGGCAGTGGGAGGTTATTTCGCTTCTGCTTTCCAACCTGCGCTGGTACATGGAGGAGTAC  
321 G Q W E V I R F L L S N L R W Y M E E Y

1021 CACTTTGACGGGTTCCGCTTTGACGGGGTTACGTCCATGCTGTACAAGCACCACGGCATT  
341 H F D G F R F D G V T S M L Y K H H G I

1081 CAGGTGCAGTTCTCGGGCGACTACCGCGAGTACTTTGGCATGCACGTGATGTTGACGCG  
361 Q V Q F S G D Y R E Y F G M H V D V D A

1141 TCGTCTACCTCATGTTGGCGAACGACCTTGTGCGGCAGGTGAACCCGGATTCCGGGAATC  
381 C V Y L M L A N D L V R Q V N P D S G I

1201 ACCATTGCTGAGGACGTGTCGGGCATGCCTACCGTGTGCCGCCCGGTCGTGGAGGGCGGG  
401 T I A E D V S G M P T V C R P V V E G G

1261 TTGGGCTTTGACTACCGGTTGGGCATGTCTGTGCCTGACAAGTGGATTGAGCTGCTGTCC  
421 L G F D Y R L G M S V P D K W I E L L S

1321 AAGGAGAAGGACGAGGCGTGGAACATGGGCAATATTGCGTTCACCCTGACCAACCGGCGT  
441 K E K D E A W N M G N I A F T L T N R R

1381 TGGAACGAGGCCACCATTGGCTACGCTGAGTCCCACGACCAGGCGCTGGTGGGGGATAAG  
461 W N E A T I G Y A E S H D Q A L V G D K

1441 ACGCTGGCTTTTTGGCTAATGGACGCGGCTATGTACACTAGCATGGGGATGGATCAACAA  
481 T L A F W L M D A A M Y T S M G M D Q Q

1501 TCCCCGGTGGTGGAGCGCGGTATCGCGCTGCACAAAATGATCCGGCTGATCTCTTATGGC  
501 S P V V E R G I A L H K M I R L I S Y G

1561 TTGGCTGGTGAAGGCTACCTGACCTTCATGGGCAACGAGTTTGGTCACCCCGAGTGGGTG  
521 L A G E G Y L T F M G N E F G H P E W V

1621 GACTTCCCTCGGGCCGGCAACGGTTTTTTCGTACGAGAAGGCGCGGCGGCTGGGACCTG  
541 D F P R A G N G F S Y E K A R R R W D L

1681 GCGGACAACAAGGGCCTCCGCTACTCCCATATGCAGCTGTGGGAGAAGCTGATGCACGAG  
561 A D N K G L R Y S H M Q L W E K L M H E

1741 CTTGAGACCAGCCACTTCTTTTGGCGCAAGGCGGTGCACCAGTACGTTGTGCTTGCGCAT

```

581      L E T S H F F C R K A V H Q Y V V L A H
1801    GACCAGGACAAGGTGGTGGCGTTTGAGAAGGGAGACCGGCTGCTGTTTGTCTTCAACTTC
601      D Q D K V V A F E K G D R L L F V F N F
1861    CATCCTACCAAGTCGTACACCGATTACCGCATCGGCACTCACTGGGGCGGAAAGTACCGC
621      H P T K S Y T D Y R I G T H W G G K Y R
1921    CTGGTGCTAGATTCGGACGGGACCAACGTGGGTGGCCAAGGCCGGGTACTGTCACGCTG
641      L V L D S D G T N V G G Q G R V H W H V
1981    GTGCACCGGACCTCCAGCTCGCCATGGCAGTCGCGGTCTCACTCGCTCCAGTTGTACCTG
661      V H R T S S S P W Q S R S H S L Q L Y L
2041    CCGTCGCGCACCTGCCAAGTGTATCATTGCTTTGAGCTGGACTCGAAGGCGGAGGAGGCA
681      P S R T C Q V Y H C F E L D S K A E E A
2101    GCGCACAAAGGCGGCACCTGCGGCTGCGGCGGCGACTACAGCAGAGACTGTCGCTGAGGTT
701      A H K A A P A A A A A T T A E T V A E V
2161    GACGCGGCTAAGGCGGCGCCCGCAGCCAAGACTGCTGCTTCCCCAACAGACGCGGCTGCC
721      D A A K A A P A A K T A A S P T D A A A
2221    CCGGAAGAGGCTGTGAAGGCAGATGGAGCCAAGAAGGCCTCTGCC TAA
741      P E E A V K A D G A K K A S A *

```

Additional file 14: Figure S3 A Nucleotide and deduced amino acid sequence of cDNA encoding 1,4-alpha-glucan branching enzyme (*PhSBE*). Nucleotide residues are numbered in the 5' to 3' direction. Amino acid residues are numbered in the N- to C-terminal direction. The start codon is marked in red color font. An asterick denotes the stop codon.

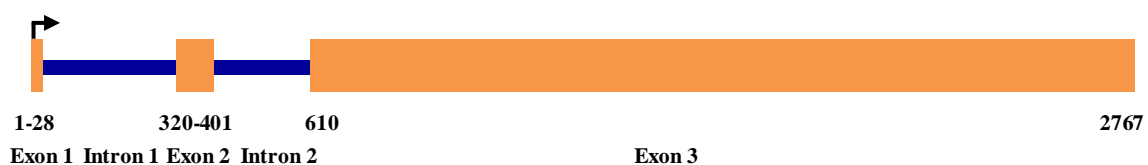

Additional file 14: Figure S3 B Genomic sequence structure of the *PhSBE* ORF (5' to 3' direction). 1 (arrow) represents start site of translation, 2767 represents end site of translation. Exon 1 (1-28), exon 2 (320-401) and exon 3 (610-2767) are depicted as red boxes. Intron 1 (29-319) and intron 2 (402-609) are depicted as narrow blue boxes.
