# Supplementary material for: Genome-wide expression profiles of Pyropia haitanensis in response to osmotic stress by using deep sequencing technology
Source: PubMed Central journal article supplement (PMC4661969; doi:10.1186/s12864-015-2226-5), 2015-11-26
Supplement: 12864_2015_2226_MOESM15_ESM.pdf [file 12864_2015_2226_MOESM15_ESM.pdf]

*Cyrtopogon haitianensis* .....MA...EKDGHFDA 10  
*Chondrus crispus* .....MGGACENTDFHFQA 14  
*Gracilaria gracilis* .....MG...SEDHYVA 10  
*Cyandioschyzon\_merolae\_strain\_10D* .....MK...EDGETRFR 11  
*Galdieria sulphuraria* .....MK 2  
*Arabidopsis\_thaliana* .....EAVTEDDQHMUVKERSVVERI 115  
*Zea\_mays* .....DISEETTCG\_AGVADQALNRVY 111  
*Oryza\_sativa* .....MASFAVSGARLG\_VVRAGG.....GGGGG.GGPAARSGGVLDPSVLFRRK.DFSRGRVVCAGAPGVKVLPPGGSGDLLLSAERFDVETQEQPEESQIPDDNKVVFEEEEIEPAVAEASIKVVAEKDLESSEVIQDIENVTGVIKDAEPTVDEKRV 152

*Pyropia\_haitianensis* .....WRCKRDTQVIAARVYEPYADSRHFTVNEIKNNEESGGGAGCAVNSHFEHAVEGVYREWRWFSQSVSVGSDNGNRRNSHQLTRGEGEWITTIIPONEISPAVHGGSKVYKCVITFGGHHLRNPA.....WATYLLIKNESTLLFD 162  
*Chondrus crispus* .....WRKNDSDGTAICDRVYEPYADSRHFTVNEIKNNEESGGGAGCAVNSHFEHAVEGVYREWRWFSQSVSVGSDNGNRRNSHQLTRGEGEWITTIIPONEISPAVHGGSKVYKCVITFGGHHLRNPA.....WATYLLIKNESTLLFD 166  
*Gracilaria gracilis* .....WRKNDSDGTAICDRVYEPYADSRHFTVNEIKNNEESGGGAGCAVNSHFEHAVEGVYREWRWFSQSVSVGSDNGNRRNSHQLTRGEGEWITTIIPONEISPAVHGGSKVYKCVITFGGHHLRNPA.....WATYLLIKNESTLLFD 162  
*Cyandioschyzon\_merolae\_strain\_10D* .....WASQTDDGVIADSEVPEFFCGDILNKNRKLKSEEMRGGGDCGYSQRLLFGLNLDDGVYREWRWFAVEVTLFDGNGNRRSLPKKREEGRSVGLFENHISGSAITFKYRVLVITFGGHHLRNPA.....WASQFLLIKNESTLLFD 163  
*Galdieria sulphuraria* .....WNEKFCPLKVVKDESEVPEFFCGDILNKNRKLKSEEMRGGGDCGYSQRLLFGLNLDDGVYREWRWFAVEVTLFDGNGNRRSHPGLKCRDSEGHYGLIDNAGSPATVASHRKLVLVITFGGHHLRNPAVYQVFLNRRATFLDNETSFVYD 162  
*Arabidopsis\_thaliana* .....VFFFGDGRKRTYDSEVPEYVYNNVDRGRKRLRDESRGGRGSRGKELRSLSDAQVYREWRWFAASRLSDGNGNRRNSMDITRNEEGWETIIPONEISPAVHGGSKVYKCVITFGGHHLRNPA.....WIKFSWAGSEIFEN 266  
*Zea\_mays* .....VFFFGDGRKRTYDSEVPEYVYNNVDRGRKRLRDESRGGRGSRGKELRSLSDAQVYREWRWFAASRLSDGNGNRRNSMDITRNEEGWETIIPONEISPAVHGGSKVYKCVITFGGHHLRNPA.....WIKFSWAGSEIFEN 262  
*Oryza\_sativa* .....IFPFGDGRKRTYDSEVPEYVYNNVDRGRKRLRDESRGGRGSRGKELRSLSDAQVYREWRWFAASRLSDGNGNRRNSMDITRNEEGWETIIPONEISPAVHGGSKVYKCVITFGGHHLRNPA.....WIKFSWAGSEIFEN 303

*Pyropia\_haitianensis* .....TVFNWPEEEKYQMKQKHFAPFCQRYVDFEENSGSDNKLKGYTDSYDINLILRFDLSTYDIAHMAIDMDFVYVSGYHVYVNFVAFSSRGGPELLEKDAIDRAGGLVIMVYVHSHASNSDGNIDGDTHTHYFFGRRGSHWRSHRYAQ 322  
*Chondrus crispus* .....AMEWHKE...SYKXKSEFHVRRPQSRIVDFEENSGSDNKLKGYTDSYDINLILRFDLSTYDIAHMAIDMDFVYVSGYHVYVNFVAFSSRGGPELLEKDAIDRAGGLVIMVYVHSHASNSDGNIDGDTHTHYFFGRRGSHWRSHRYAQ 324  
*Gracilaria gracilis* .....TVFNWPEEEKYQMKQKHFAPFCQRYVDFEENSGSDNKLKGYTDSYDINLILRFDLSTYDIAHMAIDMDFVYVSGYHVYVNFVAFSSRGGPELLEKDAIDRAGGLVIMVYVHSHASNSDGNIDGDTHTHYFFGRRGSHWRSHRYAQ 320  
*Cyandioschyzon\_merolae\_strain\_10D* .....TLFNWPEEWYVYHNCDFHVRQCDARVDFEENSGSNNEERITVYAGRDVILRFDLSTYDIAHMAIDMDFVYVSGYHVYVNFVAFSSRGGPELLEKDAIDRAGGLVIMVYVHSHASNSDGNIDGDTHTHYFFGRRGSHWRSHRYAQ 323  
*Galdieria sulphuraria* .....AVESVPEEKYVYVYHNCDFHVRQCDARVDFEENSGSNNEERITVYAGRDVILRFDLSTYDIAHMAIDMDFVYVSGYHVYVNFVAFSSRGGPELLEKDAIDRAGGLVIMVYVHSHASNSDGNIDGDTHTHYFFGRRGSHWRSHRYAQ 322  
*Arabidopsis\_thaliana* .....GIYDPEEKYVYVYHNCDFHVRQCDARVDFEENSGSNNEERITVYAGRDVILRFDLSTYDIAHMAIDMDFVYVSGYHVYVNFVAFSSRGGPELLEKDAIDRAGGLVIMVYVHSHASNSDGNIDGDTHTHYFFGRRGSHWRSHRYAQ 425  
*Zea\_mays* .....GIYDPEEKYVYVYHNCDFHVRQCDARVDFEENSGSNNEERITVYAGRDVILRFDLSTYDIAHMAIDMDFVYVSGYHVYVNFVAFSSRGGPELLEKDAIDRAGGLVIMVYVHSHASNSDGNIDGDTHTHYFFGRRGSHWRSHRYAQ 421  
*Oryza\_sativa* .....GIYDPEEKYVYVYHNCDFHVRQCDARVDFEENSGSNNEERITVYAGRDVILRFDLSTYDIAHMAIDMDFVYVSGYHVYVNFVAFSSRGGPELLEKDAIDRAGGLVIMVYVHSHASNSDGNIDGDTHTHYFFGRRGSHWRSHRYAQ 462

*Pyropia\_haitianensis* .....MVEVRELLSNRWMVDEVPDGRFRDGVTSVMHGGGQVSGSDYEVFGCTDIDCVYMLNDELVSHLHVAVAVLDVGVGMPFLGVDPGGGGLFYDRGADAPDPVTEIETEKEDDNRNINVTILNRRNNSKIGQCESHDQALVGRKM 482  
*Chondrus crispus* .....MVEVRELLSNRWMVDEVPDGRFRDGVTSVMHGGGQVSGSDYEVFGCTDIDCVYMLNDELVSHLHVAVAVLDVGVGMPFLGVDPGGGGLFYDRGADAPDPVTEIETEKEDDNRNINVTILNRRNNSKIGQCESHDQALVGRKM 484  
*Gracilaria gracilis* .....MVEVRELLSNRWMVDEVPDGRFRDGVTSVMHGGGQVSGSDYEVFGCTDIDCVYMLNDELVSHLHVAVAVLDVGVGMPFLGVDPGGGGLFYDRGADAPDPVTEIETEKEDDNRNINVTILNRRNNSKIGQCESHDQALVGRKM 480  
*Cyandioschyzon\_merolae\_strain\_10D* .....MVEVRELLSNRWMVDEVPDGRFRDGVTSVMHGGGQVSGSDYEVFGCTDIDCVYMLNDELVSHLHVAVAVLDVGVGMPFLGVDPGGGGLFYDRGADAPDPVTEIETEKEDDNRNINVTILNRRNNSKIGQCESHDQALVGRKM 482  
*Galdieria sulphuraria* .....MVEVRELLSNRWMVDEVPDGRFRDGVTSVMHGGGQVSGSDYEVFGCTDIDCVYMLNDELVSHLHVAVAVLDVGVGMPFLGVDPGGGGLFYDRGADAPDPVTEIETEKEDDNRNINVTILNRRNNSKIGQCESHDQALVGRKM 482  
*Arabidopsis\_thaliana* .....MVEVRELLSNRWMVDEVPDGRFRDGVTSVMHGGGQVSGSDYEVFGCTDIDCVYMLNDELVSHLHVAVAVLDVGVGMPFLGVDPGGGGLFYDRGADAPDPVTEIETEKEDDNRNINVTILNRRNNSKIGQCESHDQALVGRKM 583  
*Zea\_mays* .....MVEVRELLSNRWMVDEVPDGRFRDGVTSVMHGGGQVSGSDYEVFGCTDIDCVYMLNDELVSHLHVAVAVLDVGVGMPFLGVDPGGGGLFYDRGADAPDPVTEIETEKEDDNRNINVTILNRRNNSKIGQCESHDQALVGRKM 579  
*Oryza\_sativa* .....MVEVRELLSNRWMVDEVPDGRFRDGVTSVMHGGGQVSGSDYEVFGCTDIDCVYMLNDELVSHLHVAVAVLDVGVGMPFLGVDPGGGGLFYDRGADAPDPVTEIETEKEDDNRNINVTILNRRNNSKIGQCESHDQALVGRKM 620

*Pyropia\_haitianensis* .....AFRLMDMNSMVFSTLCLIRGALHKMRIRLITMGEGVYFMGMEGHPEDDFRR.....AGNNSGQYARRRWVLDGADYVHGMLNACENHALSQSHGCRSNLHWITVHNGCQVIVAVPBGGLLVFVNSHHTSWRSDR 630  
*Chondrus crispus* .....AFRLMDMNSMVFSTLCLIRGALHKMRIRLITMGEGVYFMGMEGHPEDDFRR.....AGNNSGQYARRRWVLDGADYVHGMLNACENHALSQSHGCRSNLHWITVHNGCQVIVAVPBGGLLVFVNSHHTSWRSDR 633  
*Gracilaria gracilis* .....AFRLMDMNSMVFSTLCLIRGALHKMRIRLITMGEGVYFMGMEGHPEDDFRR.....AGNNSGQYARRRWVLDGADYVHGMLNACENHALSQSHGCRSNLHWITVHNGCQVIVAVPBGGLLVFVNSHHTSWRSDR 629  
*Cyandioschyzon\_merolae\_strain\_10D* .....AFRLMDMNSMVFSTLCLIRGALHKMRIRLITMGEGVYFMGMEGHPEDDFRR.....AGNNSGQYARRRWVLDGADYVHGMLNACENHALSQSHGCRSNLHWITVHNGCQVIVAVPBGGLLVFVNSHHTSWRSDR 631  
*Galdieria sulphuraria* .....AFRLMDMNSMVFSTLCLIRGALHKMRIRLITMGEGVYFMGMEGHPEDDFRR.....AGNNSGQYARRRWVLDGADYVHGMLNACENHALSQSHGCRSNLHWITVHNGCQVIVAVPBGGLLVFVNSHHTSWRSDR 731  
*Arabidopsis\_thaliana* .....AFRLMDMNSMVFSTLCLIRGALHKMRIRLITMGEGVYFMGMEGHPEDDFRR.....AGNNSGQYARRRWVLDGADYVHGMLNACENHALSQSHGCRSNLHWITVHNGCQVIVAVPBGGLLVFVNSHHTSWRSDR 631  
*Zea\_mays* .....AFRLMDMNSMVFSTLCLIRGALHKMRIRLITMGEGVYFMGMEGHPEDDFRR.....AGNNSGQYARRRWVLDGADYVHGMLNACENHALSQSHGCRSNLHWITVHNGCQVIVAVPBGGLLVFVNSHHTSWRSDR 737  
*Oryza\_sativa* .....AFRLMDMNSMVFSTLCLIRGALHKMRIRLITMGEGVYFMGMEGHPEDDFRR.....AGNNSGQYARRRWVLDGADYVHGMLNACENHALSQSHGCRSNLHWITVHNGCQVIVAVPBGGLLVFVNSHHTSWRSDR 778

*Pyropia\_haitianensis* .....GTHWGRVRLVDSGTVNGGCGVWVHVHRSSSFFGCSHSLQLVLSSTCGVHGFSLDSKAE.....EAAHKAAF.....AAAATAETVAEVDAAKAAFAAKTAASFTDAAAEFAEAKDAGAKASA..... 755  
*Chondrus crispus* .....GTHWGRVRLVDSGTVNGGCGVWVHVHRSSSFFGCSHSLQLVLSSTCGVHGFSLDSKAE.....EAAHKAAF.....EAAHKAAF.....EPQAVTEYFSSCGVQVYVASHL.EATININGAGNGARFPEAGAKA..... 754  
*Gracilaria gracilis* .....GTHWGRVRLVDSGTVNGGCGVWVHVHRSSSFFGCSHSLQLVLSSTCGVHGFSLDSKAE.....EAAHKAAF.....EAAHKAAF.....EPQAVTEYFSSCGVQVYVASHL.EATININGAGNGARFPEAGAKA..... 766  
*Cyandioschyzon\_merolae\_strain\_10D* .....GTHWGRVRLVDSGTVNGGCGVWVHVHRSSSFFGCSHSLQLVLSSTCGVHGFSLDSKAE.....EAAHKAAF.....EAAHKAAF.....EPQAVTEYFSSCGVQVYVASHL.EATININGAGNGARFPEAGAKA..... 789  
*Galdieria sulphuraria* .....GTHWGRVRLVDSGTVNGGCGVWVHVHRSSSFFGCSHSLQLVLSSTCGVHGFSLDSKAE.....EAAHKAAF.....EAAHKAAF.....EPQAVTEYFSSCGVQVYVASHL.EATININGAGNGARFPEAGAKA..... 695  
*Arabidopsis\_thaliana* .....GTHWGRVRLVDSGTVNGGCGVWVHVHRSSSFFGCSHSLQLVLSSTCGVHGFSLDSKAE.....EAAHKAAF.....EAAHKAAF.....EPQAVTEYFSSCGVQVYVASHL.EATININGAGNGARFPEAGAKA..... 805  
*Zea\_mays* .....GTHWGRVRLVDSGTVNGGCGVWVHVHRSSSFFGCSHSLQLVLSSTCGVHGFSLDSKAE.....EAAHKAAF.....EAAHKAAF.....EPQAVTEYFSSCGVQVYVASHL.EATININGAGNGARFPEAGAKA..... 799  
*Oryza\_sativa* .....GTHWGRVRLVDSGTVNGGCGVWVHVHRSSSFFGCSHSLQLVLSSTCGVHGFSLDSKAE.....EAAHKAAF.....EAAHKAAF.....EPQAVTEYFSSCGVQVYVASHL.EATININGAGNGARFPEAGAKA..... 841

*Pyropia\_haitianensis* .....MANSQAHSERATPAGESMQAADDSSRFSPAETATAAQPQAADFDSDRRSGSTDRREHAERNRAGLFGRW 755  
*Chondrus crispus* .....MANSQAHSERATPAGESMQAADDSSRFSPAETATAAQPQAADFDSDRRSGSTDRREHAERNRAGLFGRW 754  
*Gracilaria gracilis* .....MANSQAHSERATPAGESMQAADDSSRFSPAETATAAQPQAADFDSDRRSGSTDRREHAERNRAGLFGRW 766  
*Cyandioschyzon\_merolae\_strain\_10D* .....MANSQAHSERATPAGESMQAADDSSRFSPAETATAAQPQAADFDSDRRSGSTDRREHAERNRAGLFGRW 789  
*Galdieria sulphuraria* .....MANSQAHSERATPAGESMQAADDSSRFSPAETATAAQPQAADFDSDRRSGSTDRREHAERNRAGLFGRW 695  
*Arabidopsis\_thaliana* .....MANSQAHSERATPAGESMQAADDSSRFSPAETATAAQPQAADFDSDRRSGSTDRREHAERNRAGLFGRW 805  
*Zea\_mays* .....MANSQAHSERATPAGESMQAADDSSRFSPAETATAAQPQAADFDSDRRSGSTDRREHAERNRAGLFGRW 799  
*Oryza\_sativa* .....MANSQAHSERATPAGESMQAADDSSRFSPAETATAAQPQAADFDSDRRSGSTDRREHAERNRAGLFGRW 841

*Pyropia\_haitianensis* .....g g y l d d g g r c x r y p r v y 755  
*Chondrus crispus* .....g g y l d d g g r c x r y p r v y 754  
*Gracilaria gracilis* .....g g y l d d g g r c x r y p r v y 766  
*Cyandioschyzon\_merolae\_strain\_10D* .....g g y l d d g g r c x r y p r v y 789  
*Galdieria sulphuraria* .....g g y l d d g g r c x r y p r v y 695  
*Arabidopsis\_thaliana* .....g g y l d d g g r c x r y p r v y 805  
*Zea\_mays* .....g g y l d d g g r c x r y p r v y 799  
*Oryza\_sativa* .....g g y l d d g g r c x r y p r v y 841
